# Supplementary material
Source: Elsevier journal article supplement (https://www.sciencedirect.com/science/article/pii/S1665268119300298)
Supplement: mmc1 [file S1665268119300298:mmc1.docx]

**Supplementary Table 1: Multinomial Logistic Regression Model for Treatment**

|  | **Transplant** | | | **Resection** | | | **Ablation** | | | **TACE** | | |
| --- | --- | --- | --- | --- | --- | --- | --- | --- | --- | --- | --- | --- |
|  | **OR** | **95% CI** | **p-value** | **OR** | **95% CI** | **p-value** | **OR** | **95% CI** | **p-value** | **OR** | **95% CI** | **p-value** |
| **Primary payer** |  |  | <0.001 |  |  | <0.001 |  |  | <0.001 |  |  | 0.085 |
| **Private** | Ref |  |  | Ref |  |  | Ref |  |  | Ref |  |  |
| **Medicare** | 0.63 | (0.47, 0.84) |  | 0.74 | (0.63, 0.87) |  | 1.17 | (0.93, 1.48) |  | 0.99 | (0.81, 1.20) |  |
| **Medicaid** | 0.23 | (0.15, 0.33) |  | 0.40 | (0.32, 0.51) |  | 0.52 | (0.40, 0.68) |  | 0.76 | (0.53, 1.09) |  |
| **Other** | 0.26 | (0.15, 0.45) |  | 0.42 | (0.32, 0.54) |  | 0.52 | (0.37, 0.74) |  | 0.64 | (0.43, 0.96) |  |
| **Age** |  |  | <0.001 |  |  | <0.001 |  |  | 0.001 |  |  | <0.001 |
| **≤64** | Ref |  |  | Ref |  |  | Ref |  |  | Ref |  |  |
| **65-79** | 0.47 | (0.33, 0.68) |  | 1.19 | (1.02, 1.38) |  | 0.90 | (0.72, 1.12) |  | 0.84 | (0.69, 1.01) |  |
| **≥80** | 0.04 | (0.01, 0.16) |  | 0.53 | (0.42, 0.67) |  | 0.54 | (0.38, 0.75) |  | 0.53 | (0.39, 0.71) |  |
| **Gender** |  |  | 0.088 |  |  | <0.001 |  |  | 0.021 |  |  | 0.825 |
| **Male** | Ref |  |  | Ref |  |  | Ref |  |  | Ref |  |  |
| **Female** | 1.22 | (0.97, 1.54) |  | 1.30 | (1.15, 1.47) |  | 1.23 | (1.03, 1.46) |  | 0.98 | (0.83, 1.16) |  |
| **Race** |  |  | <0.001 |  |  | <0.001 |  |  | <0.001 |  |  | 0.363 |
| **African-American** | Ref |  |  | Ref |  |  | Ref |  |  | Ref |  |  |
| **Caucasian** | 2.66 | (1.92, 3.68) |  | 1.82 | (1.48, 2.23) |  | 1.77 | (1.36, 2.30) |  | 1.15 | (0.93, 1.41) |  |
| **Hispanic** | 2.18 | (1.40, 3.39) |  | 1.24 | (0.94, 1.64) |  | 1.46 | (1.05, 2.03) |  | 1.29 | (0.97, 1.72) |  |
| **Other/Unknown** | 2.41 | (1.62, 3.61) |  | 1.79 | (1.39, 2.32) |  | 2.03 | (1.47, 2.80) |  | 1.19 | (0.90, 1.58) |  |
| **Geographic Region** |  |  | 0.071 |  |  | 0.844 |  |  | 0.279 |  |  | 0.288 |
| **Midwest** | Ref |  |  | Ref |  |  | Ref |  |  | Ref |  |  |
| **Northeast** | 0.75 | (0.45, 1.25) |  | 1.10 | (0.82, 1.46) |  | 1.56 | (0.84, 2.89) |  | 1.07 | (0.77, 1.50) |  |
| **South** | 0.68 | (0.45, 1.04) |  | 0.99 | (0.75, 1.31) |  | 1.09 | (0.58, 2.07) |  | 1.31 | (0.95, 1.80) |  |
| **West** | 0.50 | (0.29, 0.86) |  | 0.97 | (0.71, 1.32) |  | 1.34 | (0.73, 2.47) |  | 1.42 | (0.79, 2.58) |  |
| **Hepatitis C** | 2.63 | (2.06, 3.35) | <0.001 | 1.25 | (1.04, 1.50) | 0.020 | 1.88 | (1.53, 2.30) | <0.001 | 1.37 | (1.04, 1.80) | 0.025 |
| **Hepatitis B** | 1.40 | (0.91, 2.16) | 0.128 | 1.89 | (1.51, 2.36) | <0.001 | 1.10 | (0.77, 1.59) | 0.600 | 1.18 | (0.85, 1.64) | 0.316 |
| **Alcohol** | 2.60 | (1.86, 3.64) | <0.001 | 0.45 | (0.36, 0.57) | <0.001 | 2.43 | (1.83, 3.24) | <0.001 | 1.15 | (0.91, 1.46) | 0.243 |
| **NASH** | 3.66 | (2.74, 4.88) | <0.001 | 0.94 | (0.81, 1.08) | 0.371 | 4.11 | (3.37, 5.01) | <0.001 | 1.61 | (1.38, 1.88) | <0.001 |
| **Liver Decompensation Features** |  |  | <0.001 |  |  | <0.001 |  |  | <0.001 |  |  | <0.001 |
| **Zero** | Ref |  |  | Ref |  |  | Ref |  |  | Ref |  |  |
| **One** | 0.56 | (0.44, 0.73) |  | 0.29 | (0.24, 0.34) |  | 0.27 | (0.21, 0.33) |  | 0.41 | (0.34, 0.49) |  |
| **Two** | 0.48 | (0.33, 0.70) |  | 0.12 | (0.09, 0.18) |  | 0.17 | (0.12, 0.24) |  | 0.36 | (0.28, 0.46) |  |
| **Three or Greater** | 0.56 | (0.31, 1.03) |  | 0.12 | (0.06, 0.23) |  | 0.14 | (0.07, 0.28) |  | 0.41 | (0.26, 0.64) |  |
| **Elixhauser Comorbidity Score** |  |  | 0.355 |  |  | 0.016 |  |  | <0.001 |  |  | <0.001 |
| **<3** | Ref |  |  | Ref |  |  | Ref |  |  | Ref |  |  |
| **≥3** | 1.12 | (0.88, 1.42) |  | 0.85 | (0.75, 0.97) |  | 0.61 | (0.51, 0.72) |  | 0.63 | (0.54, 0.73) |  |

Noninvasive was used as the reference category. Model adjusts for age, hepatitis C, hepatitis B, alcohol, NASH, liver decompensation features, and modified Elixhauser comorbidity score (determined through backwards selection as in other models).
