# Supplementary material
Source: Elsevier journal article supplement (https://www.sciencedirect.com/science/article/pii/S1665268119300298)
Supplement: mmc2 [file S1665268119300298:mmc2.docx]

**Supplementary Table 2: Multivariate logistic regression for Liver Decompensation.**

|  | **OR** | **95% CI** | **p-value** |
| --- | --- | --- | --- |
| **Gender** |  |  | <0.001 |
| **Male** | Reference |  |  |
| **Female** | 0.84 | (0.77, 0.92) |  |
| **Race** |  |  | 0.018 |
| **African-American** | Reference |  |  |
| **Caucasian** | 1.16 | (1.03, 1.30) |  |
| **Hispanic** | 1.28 | (1.10, 1.51) |  |
| **Other/ Unknown** | 1.14 | (0.995, 1.31) |  |
| **Primary payer** |  |  | 0.005 |
| **Private Insurance** | Reference |  |  |
| **Medicare** | 1.15 | (1.02, 1.29) |  |
| **Medicaid** | 1.23 | (1.07, 1.41) |  |
| **Other** | 1.25 | (1.07, 1.46) |  |
| **Geographic Region** |  |  | 0.004 |
| **Northeast** | 0.84 | (0.71, 1.003) |  |
| **Midwest** | Reference |  |  |
| **South** | 1.02 | (0.89, 1.18) |  |
| **West** | 0.75 | (0.67, 0.83) |  |
| **Age (years)** |  |  | <0.001 |
| **≤64** | Reference |  |  |
| **65-79** | 0.75 | (0.67, 0.83) |  |
| **≥80** | 0.67 | (0.58, 0.79) |  |
| **Hepatitis C** | 0.86 | (0.77, 0.95) | 0.004 |
| **Alcohol** | 4.73 | (4.20, 5.33) | <0.001 |
| **NASH** | 3.16 | (2.88, 3.47) | <0.001 |
| **Primary Biliary Cirrhosis** | 2.13 | (1.05, 4.33) | 0.037 |
| **Metastasis** |  |  | <0.001 |
| **None** | Reference |  |  |
| **Single Site** | 1.52 | (1.35, 1.71) |  |
| **Two or More Site** | 1.82 | (1.47, 2.25) |  |
| **Elixhauser Comorbidity Score** |  |  | <0.001 |
| **<3** | Reference |  |  |
| **≥3** | 1.65 | (1.51, 1.79) |  |
