# Supplementary material
Source: Elsevier journal article supplement (https://www.sciencedirect.com/science/article/pii/S1665268119300298)
Supplement: mmc3 [file S1665268119300298:mmc3.docx]

**Supplementary Table 3: Multivariate Logistic regression for Metastatic HCC**

|  | **OR** | **95% CI** | **p-value** |
| --- | --- | --- | --- |
| **Gender** |  |  | 0.288 |
| **Male** | Reference |  |  |
| **Female** | 0.94 | (0.84, 1.05) |  |
| **Race** |  |  | 0.044 |
| **African-American** | Reference |  |  |
| **Caucasian** | 0.82 | (0.71, 0.94) |  |
| **Hispanic** | 0.87 | (0.73, 1.05) |  |
| **Other/ Unknown** | 0.84 | (0.70, 1.001) |  |
| **Primary payer** |  |  | 0.011 |
| **Private Insurance** | Reference |  |  |
| **Medicare** | 1.08 | (0.94, 1.24) |  |
| **Medicaid** | 1.29 | (1.11, 1.49) |  |
| **Other** | 1.13 | (0.95, 1.36) |  |
| **Geographic Region** |  |  | 0.408 |
| **Northeast** | 1.13 | (0.95, 1.34) |  |
| **Midwest** | Reference |  |  |
| **South** | 1.01 | (0.86, 1.18) |  |
| **West** | 1.04 | (0.87, 1.25) |  |
| **Age (years)** |  |  | 0.013 |
| **≤64** | Reference |  |  |
| **65-79** | 0.82 | (0.72, 0.94) |  |
| **≥80** | 0.80 | (0.66, 0.98) |  |
| **Hepatitis C** | 0.74 | (0.64, 0.85) | <0.001 |
| **Alcohol** | 0.52 | (0.44, 0.61) | <0.001 |
| **NASH** | 0.56 | (0.50, 0.62) | <0.001 |
| **Liver Decompensation Features** |  |  | <0.001 |
| **Zero** | Reference |  |  |
| **One** | 1.53 | (1.36, 1.73) |  |
| **Two** | 1.78 | (1.52, 2.10) |  |
| **Three or Greater** | 1.38 | (1.03, 1.85) |  |
| **Elixhauser Comorbidity Score** |  |  | 0.003 |
| **<3** | Reference |  |  |
| **≥3** | 1.17 | (1.05, 1.29) |  |
