# Supplementary material
Source: Elsevier journal article supplement (https://www.sciencedirect.com/science/article/pii/S1665268119300298)
Supplement: mmc4 [file S1665268119300298:mmc4.docx]

**Supplementary Table 4: Multivariate logistic regression for Inpatient Mortality.**

|  | **OR** | **95% CI** | **p-value** |
| --- | --- | --- | --- |
| **Gender** |  |  | <0.001 |
| **Male** | Reference |  |  |
| **Female** | 0.75 | (0.64, 0.87) |  |
| **Race** |  |  | 0.043 |
| **African-American** | Reference |  |  |
| **Caucasian** | 0.78 | (0.65, 0.93) |  |
| **Hispanic** | 0.82 | (0.66, 1.03) |  |
| **Other/ Unknown** | 0.86 | (0.69, 1.07) |  |
| **Primary payer** |  |  | <0.001 |
| **Private Insurance** | Reference |  |  |
| **Medicare** | 0.56 | (0.46, 0.69) |  |
| **Medicaid** | 0.80 | (0.65, 0.97) |  |
| **Other** | 1.11 | (0.90, 1.36) |  |
| **Geographic Region** |  |  | 0.041 |
| **Northeast** | 1.11 | (0.87, 1.40) |  |
| **Midwest** | Reference |  |  |
| **South** | 1.02 | (0.85, 1.22) |  |
| **West** | 1.29 | (1.05, 1.59) |  |
| **Age (years)** |  |  | 0.008 |
| **≤64** | Reference |  |  |
| **65-79** | 1.29 | (1.08, 1.54) |  |
| **≥80** | 1.41 | (1.10, 1.81) |  |
| **Hepatitis C** | 0.64 | (0.52, 0.77) | <0.001 |
| **Hepatitis B** | 0.68 | (0.51, 0.93) | 0.014 |
| **Alcohol** | 0.58 | (0.48, 0.70) | <0.001 |
| **NASH** | 0.75 | (0.65, 0.87) | <0.001 |
| **Liver Decompensation Features** |  |  | <0.001 |
| **Zero** | Reference |  |  |
| **One** | 1.74 | (1.48, 2.04) |  |
| **Two** | 1.65 | (1.34, 2.02) |  |
| **Three or Greater** | 3.47 | (2.62, 4.59) |  |
| **Metastasis** |  |  | 0.001 |
| **None** | Reference |  |  |
| **Single Site** | 1.19 | (1.01, 1.40) |  |
| **Two or More Sites** | 1.60 | (1.22, 2.09) |  |
| **Treatment** |  |  | <0.001 |
| **Transplant** | 0.21 | (0.11, 0.40) |  |
| **Resection** | 0.42 | (0.31, 0.55) |  |
| **Ablation** | 0.15 | (0.08, 0.27) |  |
| **TACE** | 0.53 | (0.39, 0.74) |  |
| **Noninvasive Treatment** | Reference |  |  |
